# Supplementary material
Source: MDPI journal article supplement (https://www.mdpi.com/2073-4433/12/12/1548)
Supplement: s1 [file s1]

# Characteristics and Risk Assessment of 16 Metals in Street Dust Collected from a Highway in a Densely Populated Metropolitan Area of Vietnam

Van-Truc Nguyen <sup>1</sup>, Nguyen Duy Dat <sup>2,\*</sup>, Thi-Dieu-Hien Vo <sup>3,\*</sup>, Duy-Hieu Nguyen <sup>4</sup>, Thanh-Binh Nguyen <sup>5</sup>, Ly-Sy Phu Nguyen <sup>6,7</sup>, Xuan Cuong Nguyen <sup>8,9</sup>, Viet-Cuong Dinh <sup>10</sup>, Thi-Hong-Hanh Nguyen <sup>11</sup>, Thi-Minh-Trang Huynh <sup>12</sup>, Hong-Giang Hoang <sup>13</sup>, Thi-Giang Huong Duong <sup>1</sup>, Manh-Ha Bui <sup>1</sup> and Xuan-Thanh Bui <sup>14,15</sup>

- <sup>1</sup> Department of Environmental Sciences, Saigon University, Ho Chi Minh City 700000, Vietnam; nvtruc@sgu.edu.vn (V.-T.N.); huongduong@sgu.edu.vn (T.-G.H.D.); manhhakg@sgu.edu.vn (M.-H.B.)
- <sup>2</sup> Faculty of Chemical & Food Technology, Ho Chi Minh City University of Technology and Education, Ho Chi Minh City 700000, Vietnam
- <sup>3</sup> Faculty of Environmental and Food Engineering, Nguyen Tat Thanh University, Ho Chi Minh City 700000, Vietnam
- <sup>4</sup> Ph.D. Program in Maritime Science and Technology, College of Maritime, National Kaohsiung University of Science and Technology, Kaohsiung City 81157, Taiwan; andyhieuenv@gmail.com
- <sup>5</sup> Department of Marine Environmental Engineering, National Kaohsiung University of Science and Technology, Kaohsiung City 81157, Taiwan; ntbinh179@nkust.edu.tw
- <sup>6</sup> Faculty of Environment, University of Science, Ho Chi Minh City 700000, Vietnam; nlsphu@hcmus.edu.vn
- <sup>7</sup> Vietnam National University, Ho Chi Minh City 700000, Vietnam
- <sup>8</sup> Center for Advanced Chemistry, Institute of Research and Development, Duy Tan University, Da Nang 550000, Vietnam; nguyensexuanquang4@duytan.edu.vn
- <sup>9</sup> Faculty of Environmental Chemical Engineering, Duy Tan University, Da Nang 550000, Vietnam
- <sup>10</sup> Faculty of Environmental Engineering, Hanoi University of Civil Engineering, 55 Giai Phong, Hai Ba Trung, Hanoi 100000, Vietnam; cuongdv@nuce.edu.vn
- <sup>11</sup> Department of Civil Engineering, Vietnam Maritime University, Hai Phong 180000, Vietnam; honghanh.ctt@vmaru.edu.vn
- <sup>12</sup> Graduate Institute of Applied Geology, National Central University, Taoyuan 32000, Taiwan; tranghuynh44@gmail.com
- <sup>13</sup> Faculty of Health Sciences and Finance-Accounting, Dong Nai Technology University, Dong Nai 76100, Vietnam; honggiangenv@gmail.com
- <sup>14</sup> Key Laboratory of Advanced Waste Treatment Technology, Vietnam National University Ho Chi Minh (VNU-HCM), Linh Trung Ward, Ho Chi Minh City 700000, Vietnam; bxthanh@hcmut.edu.vn
- <sup>15</sup> Faculty of Environment and Natural Resources, Ho Chi Minh City University of Technology (HCMUT), Ho Chi Minh City 700000, Vietnam
- \* Correspondence: datnd@hcmute.edu.vn (N.D.D.); vtdhien@ntt.edu.vn (T.-D.-H.V.)

**Citation:** Nguyen, V.-T.; Duy Dat, N.; Vo, T.-D.-H.; Nguyen, D.-H.; Nguyen, T.-B.; Nguyen, L.-S.P.; Nguyen, X.C.; Dinh, V.-C.; Nguyen, T.-H.-H.; Huynh, T.-M.-T.; et al. Characteristics and Risk Assessment of 16 Metals in Street Dust Collected from a Highway in a Densely Populated Metropolitan Area of Vietnam. *Atmosphere* **2021**, *12*, 1548. <https://doi.org/10.3390/atmos12121548>

Academic Editors: Dmitry Vlasov, Omar Ramírez Hernández and Ashok Luhar

Received: 24 October 2021

Accepted: 17 November 2021

Published: 24 November 2021

**Publisher's Note:** MDPI stays neutral with regard to jurisdictional claims in published maps and institutional affiliations.

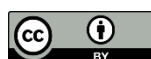

**Copyright:** © 2021 by the authors. Licensee MDPI, Basel, Switzerland. This article is an open access article distributed under the terms and conditions of the Creative Commons Attribution (CC BY) license (<https://creativecommons.org/licenses/by/4.0/>).

## Supplementary Information:

**Table S1.** Location and GPS coordinates of sampling (D) and background sites (BG).

| Sampling Site | Street          | Coordinates   |                |
|---------------|-----------------|---------------|----------------|
| D1            | Ha Noi highway  | N 10°52.694'  | E 106°48.734'  |
| D2            | Ha Noi highway  | N 10°51.936'  | E 106°48.013'  |
| D3            | Ha Noi highway  | N 10°51.382'  | E 106°47.079'  |
| D4            | Ha Noi highway  | N 10°49.761'  | E 106°45.733'  |
| D5            | Ha Noi highway  | N 10°48.572'  | E 106°45.357'  |
| D6            | Ha Noi highway  | N 10°48.097'  | E 106°44.446'  |
| D7            | Ha Noi highway  | N 10°48.097'  | E 106°44.446'  |
| D8            | Ha Noi highway  | N 10°47.900'  | E 106°43.246'  |
| D9            | Ha Noi highway  | N 10°47.917'  | E 106°42.300'  |
| D10           | Ha Noi highway  | N 10°47'56.8" | E 106°42'19.7" |
| BG1           | Rung sac street | N 10°30.425'  | E 106°51.850'  |
| BG2           | Rung sac street | N 10°35.619'  | E 106°49.336'  |
| BG3           | Rung sac street | N 10°39.777'  | E 106°46.642'  |

**Table S2.** The geo-accumulation index classification, standard criteria of enrichment factor, and pollution load index classification for the assessment of the pollution status of the sampling sites.

| Index     | Classification       | Description                               |
|-----------|----------------------|-------------------------------------------|
| $I_{geo}$ | $I_{geo} \leq 0$     | Uncontaminated                            |
|           | $0 < I_{geo} \leq 1$ | Uncontaminated to moderately contaminated |
|           | $1 < I_{geo} \leq 2$ | Moderately contaminated                   |
|           | $2 < I_{geo} \leq 3$ | Moderately to strong contaminated         |
|           | $3 < I_{geo} \leq 4$ | Strongly contaminated                     |
|           | $4 < I_{geo} \leq 5$ | Strongly to extremely contaminated        |
|           | $I_{geo} > 5$        | Extremely contaminated                    |
| EF        | $EF < 1$             | No enrichment                             |
|           | $1 \leq EF < 3$      | Minor enrichment                          |
|           | $3 \leq EF < 5$      | Moderate enrichment                       |
|           | $5 \leq EF < 10$     | Moderate severe enrichment                |
|           | $10 \leq EF < 25$    | Severe enrichment                         |
|           | $25 \leq EF < 50$    | Very severe enrichment                    |
|           | $EF \geq 50$         | Extremely severe enrichment               |
| $P_i$     | $P_i \leq 0.7$       | Unpolluted                                |
|           | $0.7 < P_i \leq 1$   | Slightly polluted                         |
|           | $1 < P_i \leq 2$     | Low polluted                              |
|           | $2 < P_i \leq 3$     | Moderately polluted                       |
|           | $P_i \geq 3$         | Heavily polluted                          |
| PLI       | $PLI \leq 1$         | Unpolluted                                |
|           | $1 < PLI \leq 2$     | Low polluted                              |
|           | $2 < PLI \leq 3$     | Moderately polluted                       |
|           | $PLI \geq 3$         | Heavily polluted                          |

**Table S3.** The potential ecological risk index ( $E_i$ ), The potential ecological risk (PER) classification for ecological risk assessment.

| Index | Classification       | Description  |
|-------|----------------------|--------------|
| $E_i$ | $E_i < 15$           | Low          |
|       | $15 \leq E_i < 30$   | Moderate     |
|       | $30 \leq E_i < 60$   | Considerable |
|       | $60 \leq E_i < 120$  | High         |
|       | $E_i \geq 120$       | Very high    |
| PER   | $PER < 50$           | Low          |
|       | $50 \leq PER < 100$  | Moderate     |
|       | $100 \leq PER < 200$ | Considerable |
|       | $PER \geq 200$       | High         |

**Table S4.** Concentrations (mg/kg) of metals in street dust of the different sampling sites

| Sites           | Se  | Cd  | Sb  | Mo  | B   | Sn   | As   | Co   | Ni   | V    | Pb   | Cr    | Cu    | Mn    | Zn     | Ti    |
|-----------------|-----|-----|-----|-----|-----|------|------|------|------|------|------|-------|-------|-------|--------|-------|
| D1              | 0.3 | 0.3 | 0.9 | 2.7 | 6.3 | 6.0  | 11.9 | 9.7  | 27.2 | 40.6 | 42.9 | 59.5  | 123.5 | 511.4 | 411.0  | 691.1 |
| D2              | 0.4 | 0.3 | 0.6 | 2.1 | 6.1 | 3.8  | 7.4  | 7.2  | 19.9 | 38.7 | 46.4 | 51.3  | 149.3 | 364.4 | 283.6  | 788.9 |
| D3              | 0.7 | 0.4 | 0.8 | 4.1 | 7.1 | 7.0  | 8.8  | 8.8  | 28.7 | 41.0 | 75.8 | 83.4  | 162.0 | 535.0 | 1062.7 | 957.2 |
| D4              | 0.4 | 0.9 | 1.4 | 7.0 | 5.5 | 14.9 | 10.2 | 10.3 | 55.7 | 41.2 | 93.5 | 123.6 | 289.4 | 642.7 | 801.3  | 812.2 |
| D5              | 0.3 | 0.4 | 1.0 | 6.8 | 5.4 | 9.1  | 8.8  | 9.1  | 34.0 | 36.2 | 60.0 | 102.5 | 155.1 | 475.0 | 952.2  | 632.8 |
| D6              | 0.3 | 0.4 | 1.0 | 4.9 | 5.8 | 7.6  | 10.0 | 8.1  | 27.5 | 35.6 | 49.6 | 79.0  | 135.4 | 436.1 | 525.7  | 750.9 |
| D7              | 0.5 | 0.2 | 0.4 | 3.1 | 4.4 | 3.6  | 10.4 | 7.1  | 28.4 | 28.0 | 24.7 | 61.0  | 72.0  | 305.9 | 172.6  | 521.6 |
| D8              | 0.3 | 0.4 | 0.8 | 3.2 | 6.6 | 7.0  | 5.5  | 8.1  | 30.7 | 36.6 | 71.6 | 94.6  | 163.8 | 359.9 | 423.2  | 625.9 |
| D9              | 0.3 | 0.2 | 0.4 | 3.1 | 4.3 | 2.1  | 4.9  | 6.2  | 25.8 | 24.7 | 23.6 | 65.6  | 64.7  | 302.9 | 136.1  | 443.8 |
| D10             | 0.3 | 2.2 | 0.5 | 4.3 | 5.6 | 8.9  | 4.7  | 8.3  | 31.5 | 32.5 | 33.8 | 93.3  | 132.3 | 332.4 | 423.0  | 538.5 |
| Mean            | 0.4 | 0.6 | 0.8 | 4.1 | 5.7 | 7.0  | 8.3  | 8.3  | 30.9 | 35.5 | 52.2 | 81.4  | 144.7 | 426.6 | 519.2  | 676.3 |
| SD              | 0.1 | 0.6 | 0.3 | 1.7 | 0.9 | 3.6  | 2.5  | 1.2  | 9.5  | 5.6  | 22.9 | 22.6  | 61.5  | 113.1 | 318.9  | 155.4 |
| CV              | 0.3 | 1.1 | 0.4 | 0.4 | 0.2 | 0.5  | 0.3  | 0.1  | 0.3  | 0.2  | 0.4  | 0.3   | 0.4   | 0.3   | 0.6    | 0.2   |
| Min             | 0.3 | 0.2 | 0.4 | 2.1 | 4.3 | 2.1  | 4.7  | 6.2  | 19.9 | 24.7 | 23.6 | 51.3  | 64.7  | 302.9 | 136.1  | 443.8 |
| Max             | 0.7 | 2.2 | 1.4 | 7.0 | 7.1 | 14.9 | 11.9 | 10.3 | 55.7 | 41.2 | 93.5 | 123.6 | 289.4 | 642.7 | 1062.7 | 957.2 |
| Background Soil | 0.3 | 0.1 | 0.3 | 0.7 | 2.1 | 1.2  | 4.7  | 7.2  | 15.8 | 24.6 | 13.7 | 27.1  | 27.1  | 296.3 | 71.3   | 466.2 |

SD: standard deviation, Min: minimum, Max: maximum, CV: coefficients of variation (CV: ratio of the standard deviation to the mean)

**Table S5.** Results of principal component analysis for 16 heavy metals in street dust in Ha Noi highway, Ho Chi Minh City.

| Heavy metals  | Principal Components |             |             |
|---------------|----------------------|-------------|-------------|
|               | PC1                  | PC2         | PC3         |
| Se            | 0.52                 | <b>0.69</b> | 0.30        |
| Cd            | 0.34                 | −0.53       | <b>0.48</b> |
| Sb            | <b>0.94</b>          | −0.13       | −0.67       |
| Mo            | <b>0.57</b>          | −0.34       | −0.48       |
| B             | 0.07                 | <b>0.59</b> | 0.29        |
| Sn            | <b>0.91</b>          | −0.06       | 0.14        |
| As            | <b>0.89</b>          | 0.05        | −0.78       |
| Co            | <b>0.90</b>          | −0.01       | −0.20       |
| Ni            | <b>0.62</b>          | −0.36       | −0.43       |
| V             | <b>0.71</b>          | 0.22        | 0.39        |
| Pb            | <b>0.94</b>          | 0.29        | 0.35        |
| Cr            | <b>0.63</b>          | −0.47       | 0.37        |
| Cu            | <b>0.94</b>          | −0.33       | 0.29        |
| Mn            | 0.44                 | <b>0.96</b> | −0.54       |
| Zn            | 0.37                 | <b>0.77</b> | 0.25        |
| Ti            | 0.50                 | <b>0.65</b> | 0.35        |
| Eigenvalues   | 9.08                 | 2.93        | 1.48        |
| % of Variance | 56.81                | 18.30       | 9.22        |
| Cumulative %  | 56.81                | 75.11       | 84.33       |

Extraction method: principal component analysis

Rotation method: Varimax with Kaiser normalization

Bold values indicate high load

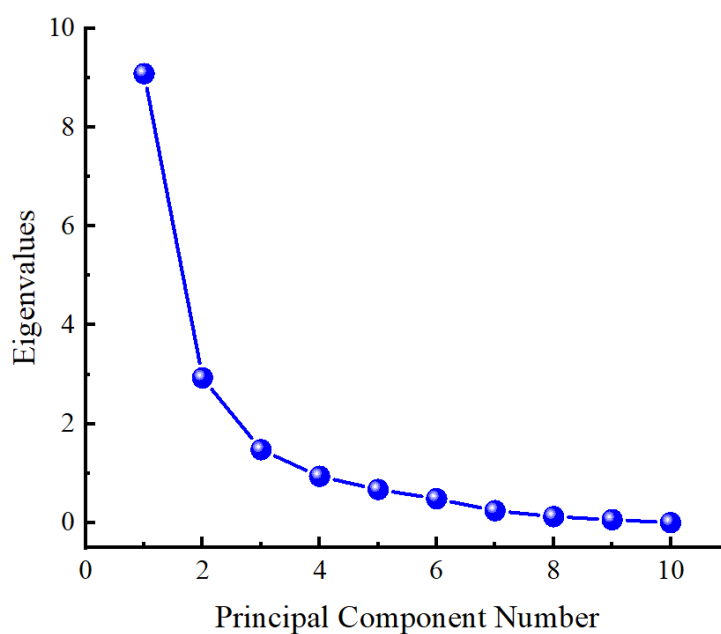**Figure S1.** The scree plot of PCA.
